# Supplementary material for: Children’s Development and Parental Input: Evidence From the UK Millennium Cohort Study
Source: Springer Nature journal article supplement (doi:10.1007/s13524-017-0554-6), 2017-02-23
Supplement: MOESM1 [file 12088798]

## **Online Resource 1**

### **Children's Development and Parental Input: Evidence From the UK Millennium Cohort Study**

Mónica Hernández-Alava and Gurleen Popli

**Table S1:** Unweighted sample descriptive statistics of cognitive and noncognitive measurement variables

|                                             | Age of child |         |      |         |         |      |         |         |      |         |         |      |
|---------------------------------------------|--------------|---------|------|---------|---------|------|---------|---------|------|---------|---------|------|
|                                             | 9 months     |         |      | 3 years |         |      | 5 years |         |      | 7 years |         |      |
|                                             | Mean         | Std dev | n    | Mean    | Std dev | n    | Mean    | Std dev | n    | Mean    | Std dev | n    |
| <i>Cognitive measures</i>                   |              |         |      |         |         |      |         |         |      |         |         |      |
| Gross motor function delay <sup>(1)</sup>   | 0.107        | 0.309   | 9600 |         |         |      |         |         |      |         |         |      |
| Fine motor function delay <sup>(1)</sup>    | 0.124        | 0.330   | 9567 |         |         |      |         |         |      |         |         |      |
| Communicative gestures delay <sup>(1)</sup> | 0.388        | 0.487   | 9560 |         |         |      |         |         |      |         |         |      |
| BSR composite standard score                | 53.440       | 28.400  | 8755 |         |         |      |         |         |      |         |         |      |
| BAS Naming Vocabulary                       | 53.267       | 28.249  | 9154 | 53.006  | 28.240  | 9512 |         |         |      |         |         |      |
| BAS Picture Similarity                      |              |         |      | 51.686  | 28.430  | 9502 |         |         |      |         |         |      |
| BAS Pattern Construction                    |              |         |      | 52.771  | 28.531  | 9485 | 52.213  | 28.493  | 9447 |         |         |      |
| BAS Word Reading                            |              |         |      |         |         |      | 51.780  | 28.385  | 9339 |         |         |      |
| Numerical&Analytical Skills                 |              |         |      |         |         |      | 51.949  | 28.268  | 9473 |         |         |      |
| <i>Non-cognitive measures</i>               |              |         |      |         |         |      |         |         |      |         |         |      |
| Low positive mood <sup>(1)</sup>            | 0.489        | 0.500   | 8793 |         |         |      |         |         |      |         |         |      |
| Distress to novelty <sup>(1)</sup>          | 0.444        | 0.497   | 6339 |         |         |      |         |         |      |         |         |      |
| Irregularity <sup>(1)</sup>                 | 0.433        | 0.496   | 9126 |         |         |      |         |         |      |         |         |      |
| Hyperactivity Scale <sup>(2)</sup>          |              |         |      | 4.086   | 1.702   | 9230 | 4.009   | 1.470   | 9406 | 4.164   | 1.500   | 9413 |
| Emotional Symptoms Scale <sup>(2)</sup>     |              |         |      | 1.271   | 1.400   | 9302 | 1.293   | 1.509   | 9439 | 1.448   | 1.694   | 9415 |
| Conduct Problems Scale <sup>(2)</sup>       |              |         |      | 3.317   | 1.616   | 9313 | 2.477   | 1.065   | 9447 | 2.468   | 1.059   | 9431 |
| Peer Problems Scale <sup>(2)</sup>          |              |         |      | 4.350   | 1.328   | 9244 | 4.647   | 1.129   | 9429 | 4.688   | 1.138   | 9412 |

<sup>(1)</sup>Dummy variable

<sup>(2)</sup>Higher values indicate worse behavioural problems

**Table S2:** Unweighted sample descriptive statistics of parental investment measurement variables.

| Measure                                                       | Age of child |         |      |       |         |         |       |         |      |      |         |   |
|---------------------------------------------------------------|--------------|---------|------|-------|---------|---------|-------|---------|------|------|---------|---|
|                                                               | 9 months     |         |      |       |         | 3 years |       |         |      |      | 5 years |   |
|                                                               | Mean         | Std dev | n    | Mean  | Std dev | n       | Mean  | Std dev | n    | Mean | Std dev | n |
| Importance of stimulating baby <sup>(1)</sup>                 | 1.384        | 0.598   | 9406 |       |         |         |       |         |      |      |         |   |
| Importance of talking to baby <sup>(1)</sup>                  | 1.176        | 0.427   | 9408 |       |         |         |       |         |      |      |         |   |
| importance of cuddling baby <sup>(1)</sup>                    | 1.172        | 0.439   | 9408 |       |         |         |       |         |      |      |         |   |
| Importance of regular sleeping/eating for baby <sup>(1)</sup> | 1.588        | 0.742   | 9406 | 3.319 | 1.006   | 9602    | 3.265 | 0.925   | 9597 |      |         |   |
| Frequency mother reads to the child <sup>(2)</sup>            |              |         |      | 2.088 | 1.372   | 8302    | 2.014 | 1.315   | 8750 |      |         |   |
| Frequency father reads to the child <sup>(2)</sup>            |              |         |      | 0.494 | 0.747   | 9602    | 0.443 | 0.655   | 9597 |      |         |   |
| Frequency child taken to the library <sup>(3)</sup>           |              |         |      | 3.173 | 0.919   | 9602    | 1.990 | 0.995   | 9597 |      |         |   |
| Frequency child paints/draws at home <sup>(2)</sup>           |              |         |      | 2.133 | 1.387   | 9602    |       |         |      |      |         |   |
| Frequency child helped with alphabet <sup>(2)</sup>           |              |         |      |       |         |         |       |         |      |      |         |   |
| Frequency child helped with reading <sup>(2)</sup>            |              |         |      |       |         |         |       |         |      |      |         |   |
| Frequency child helped with writing <sup>(2)</sup>            |              |         |      |       |         |         |       |         |      |      |         |   |
| Frequency child helped with counting/maths <sup>(2)</sup>     |              |         |      | 3.162 | 1.052   | 9602    | 2.814 | 1.150   | 9601 |      |         |   |
| Frequency regular bedtime <sup>(4)</sup>                      |              |         |      | 2.152 | 0.897   | 9602    | 2.493 | 0.779   | 9601 |      |         |   |
| Frequency watching TV <sup>(5)</sup>                          |              |         |      | 1.927 | 0.652   | 9596    | 1.915 | 0.634   | 9594 |      |         |   |

<sup>(1)</sup> Coded as (1) strongly agree, (2) agree, (3) neither agree nor disagree, (4) disagree, (5) strongly disagree

<sup>(2)</sup> Coded as (0) not at all, (1) once/twice/less a month, (2) once/twice a week, (3) several times a week, (4) every day

<sup>(3)</sup> Coded as (0) never/special occasion, (1) at least once a month, (2) once a week or more

<sup>(4)</sup> Coded as (0) never or almost never, (1) sometimes, (2) usually, (3) always

<sup>(5)</sup> Coded as (0) none, (1) up to one hour, (2) between 1 and 3 hours, (3) more than 3 hours

**Table S3:** Unweighted descriptive statistics of sample covariates

|                                            | Mean  | Std dev |
|--------------------------------------------|-------|---------|
| Birthweight (Kg)                           | 3.47  | 0.46    |
| Male                                       | 0.50  | 0.50    |
| White                                      | 0.88  | 0.33    |
| Child's age - 1st wave (months)            | 9.19  | 0.50    |
| Child's age - 2nd wave (months)            | 37.54 | 2.34    |
| Child's age - 3rd wave (months)            | 62.63 | 2.92    |
| Child's age - 4th wave (months)            | 86.78 | 2.99    |
| Mother's age at birth (years)              | 29.20 | 5.61    |
| Parental socioeconomic status              |       |         |
| - managerial/professional                  | 0.48  | 0.50    |
| - intermediate                             | 0.14  | 0.35    |
| - small employer/self employed             | 0.07  | 0.25    |
| - lower supervisors/technical              | 0.09  | 0.29    |
| - semi-routine and routine (baseline)      |       |         |
| Mother NVQ 4 or higher - 1st wave          | 0.36  | 0.48    |
| Mother NVQ 4 or higher - 2nd wave          | 0.36  | 0.48    |
| Mother NVQ 4 or higher - 3rd wave          | 0.39  | 0.49    |
| Single parent household - 1st wave         | 0.11  | 0.31    |
| Single parent household - 2nd wave         | 0.13  | 0.34    |
| Single parent household - 3rd wave         | 0.15  | 0.36    |
| Length of breastfeeding (months)           | 2.90  | 3.43    |
| Number of siblings - 1st wave              | 0.92  | 1.01    |
| Number of siblings - 2nd wave              | 1.20  | 1.03    |
| Number of siblings - 3rd wave              | 1.39  | 1.02    |
| English and other language spoken at home  | 0.09  | 0.28    |
| No English spoken at home - other language | 0.03  | 0.16    |

**Table S4:** Correlation matrix of latent child ability

|              | $\theta_0^C$ | $\theta_0^N$ | $\theta_1^C$ | $\theta_1^N$ | $\theta_2^C$ | $\theta_2^N$ | $\theta_3^C$ | $\theta_3^N$ |
|--------------|--------------|--------------|--------------|--------------|--------------|--------------|--------------|--------------|
| $\theta_0^C$ | 1            |              |              |              |              |              |              |              |
| $\theta_0^N$ | 0.20         | 1            |              |              |              |              |              |              |
| $\theta_1^C$ | 0.62         | 0.24         | 1            |              |              |              |              |              |
| $\theta_1^N$ | 0.32         | 0.49         | 0.25         | 1            |              |              |              |              |
| $\theta_2^C$ | 0.49         | 0.20         | 0.78         | 0.22         | 1            |              |              |              |
| $\theta_2^N$ | 0.27         | 0.40         | 0.22         | 0.81         | 0.23         | 1            |              |              |
| $\theta_3^C$ | 0.45         | 0.19         | 0.68         | 0.21         | 0.87         | 0.22         | 1            |              |
| $\theta_3^N$ | 0.28         | 0.38         | 0.23         | 0.77         | 0.24         | 0.96         | 0.26         | 1            |

All correlations are significant at 1% level
